# Supplementary material
Source: publisher figshare collection journal article supplement (https://geolsoc.figshare.com/ndownloader/files/25778033)

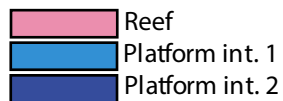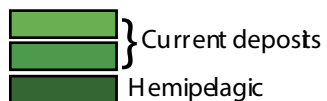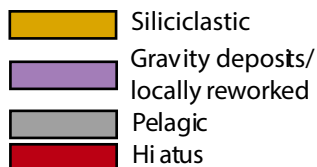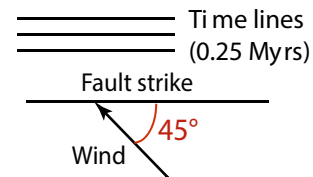

Model Run 61: base  
model

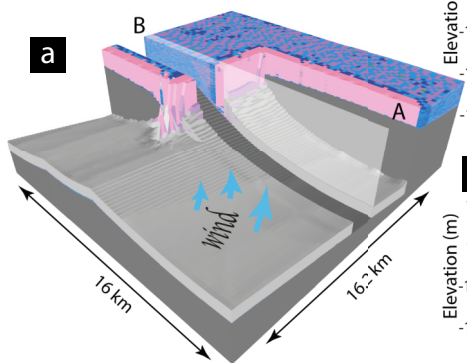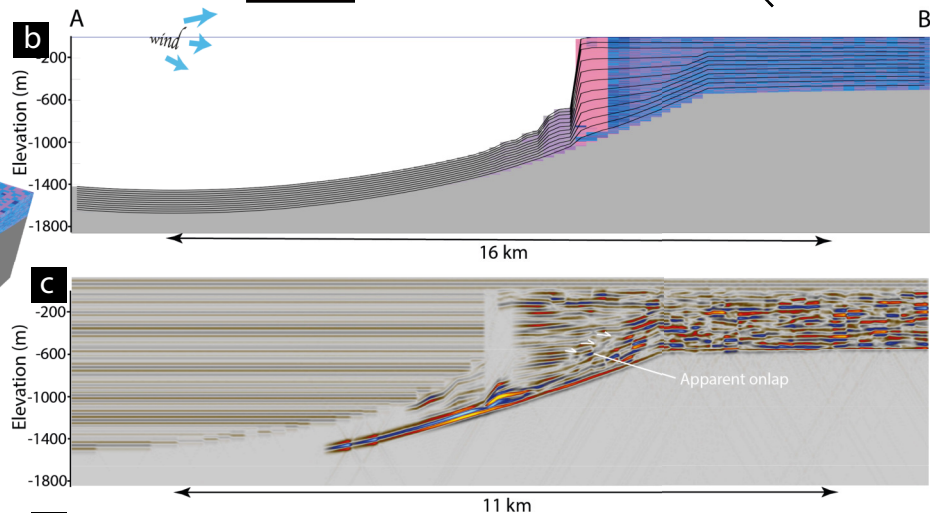

Model Run 62: eustatic  
control

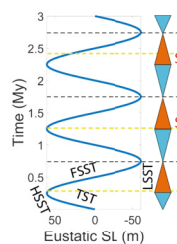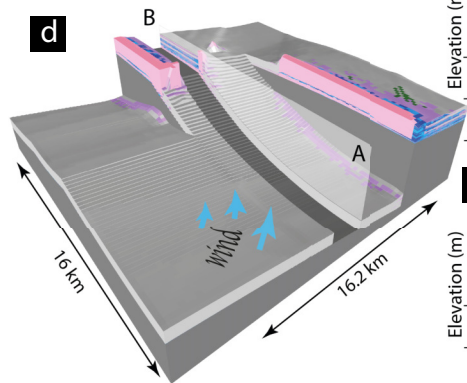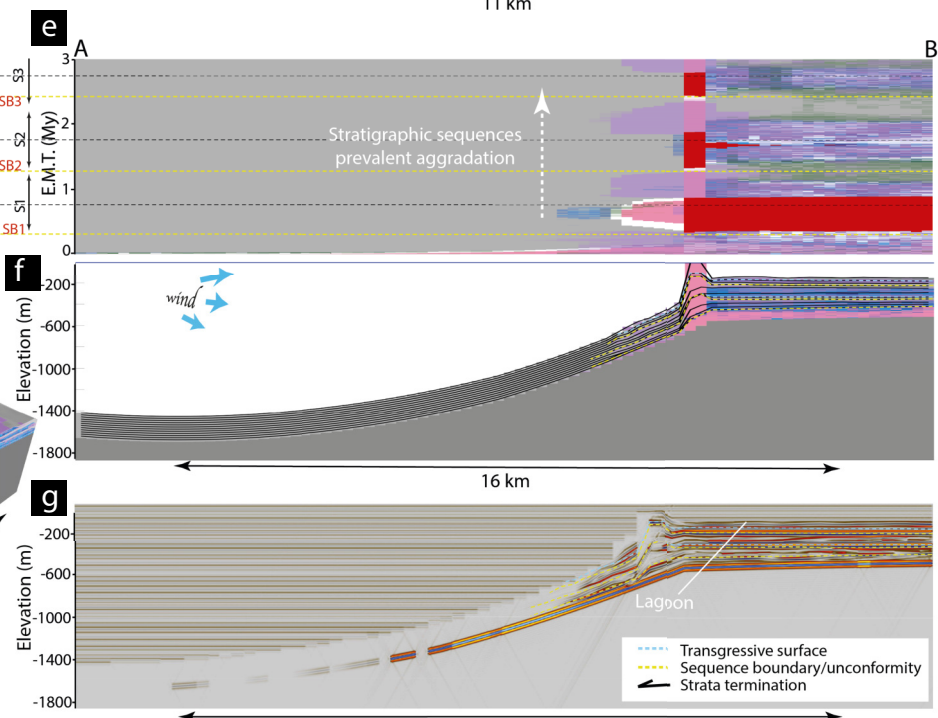

Supplement: Supplementary file 1 [file 25778033]
